1 **Analysis of the global frequency and penetrance of *ATP7B***  
2 **variants: implications for Wilson disease prevalence**

3

4 Daniel F. Wallace<sup>1\*</sup>, James S. Dooley<sup>2</sup>

5 <sup>1</sup> Institute of Health and Biomedical Innovation and School of Biomedical Sciences,  
6 Queensland University of Technology, Brisbane, Queensland, Australia.

7 <sup>2</sup> UCL Institute for Liver and Digestive Health, Division of Medicine, University  
8 College London Medical School (Royal Free Campus), London, UK.

9

10 \* Corresponding author:

11 Email: [d5.wallace@qut.edu.au](mailto:d5.wallace@qut.edu.au) (DW)

12

13

14

15

## 16 **Abstract**

17 Wilson disease (WD) is a genetic disorder of copper metabolism. It can present with  
18 hepatic and neurological symptoms, due to copper accumulation in the liver and  
19 brain. WD is caused by compound heterozygosity or homozygosity for mutations in  
20 the copper transporting P-type ATPase gene *ATP7B*. Over 700 *ATP7B* genetic  
21 variants have been associated with WD. Estimates for WD population prevalence  
22 vary with 1 in 30,000 generally quoted. However, some studies have estimated much  
23 higher prevalence rates. The aim of this study was to estimate the population  
24 prevalence of WD by determining the frequency and evaluating the pathogenicity of  
25 *ATP7B* variants in a genomic sequence database. A catalogue of 732 WD-  
26 associated *ATP7B* variants was constructed using data from the WD Mutation  
27 Database and a literature review. A total of 231 WD-associated *ATP7B* variants were  
28 present in the gnomAD dataset giving an estimated population prevalence of around  
29 1 in 2400 with a carrier rate of 1 in 25. Pathogenicity of the variants was assessed by  
30 (a) comparing gnomAD allele frequencies against the number of reports for variants  
31 in the WD literature and (b) using variant effect prediction algorithms. After exclusion  
32 of WD-associated *ATP7B* variants with predicted low penetrance, the revised  
33 estimates showed a prevalence of around 1 in 20,000, with higher rates in the Asian  
34 and Ashkenazi Jewish populations. *Conclusion:* We have calculated the prevalence  
35 of WD based on genomic sequencing data and our results highlight the importance  
36 of assessing penetrance when assigning causality to genetic variants. The high  
37 frequency of low penetrant *ATP7B* variants raises the possibility that these variants  
38 could contribute to abnormalities in copper homeostasis that do not manifest in a  
39 clear WD phenotype and diagnosis.

40

## 41 **Author Summary**

42 Wilson disease is a genetic disorder that causes copper accumulation in the liver  
43 and brain. It is caused by mutations in the *ATP7B* gene that encodes a protein  
44 involved in transporting copper across cell membranes. We used genomic  
45 sequencing data from more than 120,000 people from 8 global populations to  
46 estimate the prevalence of mutations that cause Wilson disease. From these data  
47 we calculated the predicted prevalence of Wilson disease and found that it is much  
48 higher than traditional estimates. Further analysis revealed that this high prevalence  
49 is likely due to several mutations that are too common to be a major cause of the  
50 disease and may only have mild effects on ATP7B protein function. After taking  
51 these mild mutations into account in our estimates of disease prevalence, we predict  
52 that Wilson disease has a population prevalence of around 1 in 20,000 with higher  
53 rates in East Asian and Ashkenazi Jewish populations. Our results suggest that  
54 some mutations in ATP7B may cause milder forms of Wilson disease.

## 55 **Introduction**

56 Wilson disease (WD) is a rare autosomal recessive disorder of copper metabolism,  
57 resulting in copper accumulation with, most characteristically, hepatic and/or  
58 neurological disease [1]. It is caused by mutations in the gene encoding ATP7B, a  
59 copper transporter which in hepatocytes not only transports copper into the  
60 transGolgi for association with apoceruloplasmin, but is fundamental for the  
61 excretion of copper into bile [1].

62 In WD copper accumulates in the liver, causing acute and/or chronic hepatitis and  
63 cirrhosis. Neuropsychiatric features are seen due to accumulation of copper in the  
64 brain. Other organs and tissues involved include the cornea (with the development of  
65 Kayser-Fleischer rings) and the kidneys.

66 There is a wide clinical phenotype and age of presentation. Early diagnosis and  
67 treatment are important for successful management. Diagnosis can be  
68 straightforward with a low serum ceruloplasmin associated with Kayser-Fleischer  
69 rings in the eyes, but may be difficult, requiring further laboratory tests, liver copper  
70 estimation and molecular genetic studies for *ATP7B* mutations.

71 Over 700 mutations in *ATP7B* have been reported as associated with WD. The  
72 majority of patients are compound heterozygotes, the minority being homozygous for  
73 a single mutation. Phenotype/genotype studies to date have shown a poor  
74 relationship [2, 3], and there have been studies and increasing interest in modifying  
75 genes and factors [4].

76 Currently treatment of WD is either with chelators (d-penicillamine or trientine) which  
77 increase urinary copper excretion or zinc salts which reduce intestinal copper

78 absorption [1]. Liver transplantation may be needed for acute liver failure or  
79 decompensated liver disease unresponsive to treatment [1].

80 The prevalence of WD has been studied in several ways. In 1984 Scheinberg and  
81 Sternlieb [5] from their own data, the report from Bachmann et al [6] based on an  
82 accurately ascertained incidence, and data from Japan published by Saito [7],  
83 concluded that the worldwide prevalence of WD is around 30 per million. Screening  
84 studies using a low ceruloplasmin as the target have suggested that WD may be  
85 much more frequent [8, 9]. A molecular genetic study of 1000 control subjects in the  
86 UK, however, found an estimated potential prevalence of 1 in 7000 [10]. Next  
87 generation DNA sequencing (NGS) databases provide the opportunity to analyse the  
88 prevalence of WD mutations in large populations and sub-populations. The gnomAD  
89 database contains variant frequencies derived from the whole exome or whole  
90 genome sequencing of over 120,000 people, from eight ethnic subgroups. NGS  
91 datasets are valuable resources and have been used by us and others for estimating  
92 the population prevalence of genetic diseases, such as HFE and non-HFE  
93 hemochromatosis [11] and primary ubiquinone deficiency [12].

94 This study has: (1) collated reported variants in patients with WD; (2) searched a  
95 NGS dataset to define the prevalence of these variants, and (3) refined the  
96 prevalence data by analysing differences in variant penetrance.

97 The resulting prevalence derived from this study is intermediate between historical  
98 estimates and those from more recent studies, at approximately 1 in 19,500, with  
99 variation above and below this in specific populations.

## 100 **Results**

### 101 **Wilson disease-associated *ATP7B* variants**

102 The WDMD contained 525 unique *ATP7B* variants that have been reported in  
103 patients with WD and classified as disease causing (Supporting Table S1). A  
104 literature search (between 2010 and April 2017) revealed a further 207 unique  
105 *ATP7B* variants associated with WD since the last update of the WDMD (Supporting  
106 Table S2). Thus 732 *ATP7B* variants predicted to be causative of WD have been  
107 reported up until April 2017. For this study we refer to these 732 variants as WD-  
108 associated *ATP7B* (WD-*ATP7B*) variants.

109 The WD-*ATP7B* variants were categorized into their predicted functional effects, with  
110 the majority (400) being single base missense (non-synonymous) substitutions  
111 (Table 1). Variants predicted to cause major disruption to the protein coding  
112 sequence were further classified as loss of function (LoF). Variants were considered  
113 LoF if they were frameshift, stop gain (nonsense), start loss, splice donor, splice  
114 acceptor variants or large deletions involving whole exons. A total of 279 WD-*ATP7B*  
115 variants were categorized as LoF (Table 1) and their pathogenicity was considered  
116 to be high.

117

118 **Table 1. Predicted functional consequences of WD-ATP7B variants**

| Variant category                                      | Number of variants | Loss of function (LoF) | Number in gnomAD |
|-------------------------------------------------------|--------------------|------------------------|------------------|
| Missense (non-synonymous)                             | 400 (55%)          |                        | 158 (68%)        |
| Frameshift deletions, insertions or substitutions     | 170 (23%)          | Yes                    | 23 (10%)         |
| Stop gain (nonsense)                                  | 64 (9%)            | Yes                    | 22 (10%)         |
| Splice donor or acceptor                              | 43 (6%)            | Yes                    | 10 (4%)          |
| Non-frameshift deletions, insertions or substitutions | 26 (4%)            |                        | 4 (2%)           |
| Intronic variants                                     | 22 (3%)            |                        | 13 (6%)          |
| Promoter variants                                     | 2 (0.3%)           |                        |                  |
| 5' UTR variants                                       | 2 (0.3%)           |                        | 1 (0.4%)         |
| Large deletions                                       | 2 (0.3%)           | Yes                    |                  |
| Stop loss                                             | 1 (0.1%)           |                        |                  |
| Total                                                 | 732                |                        | 231              |

119

120 **Prevalence of WD-ATP7B variants in the gnomAD dataset**

121 Of the 732 WD-ATP7B variants 231 were present in the gnomAD dataset derived  
122 from >120,000 individuals [13] (Table 1). There was a higher proportion of missense  
123 variants among the WD-ATP7B variants present in gnomAD compared to the total  
124 WD-ATP7B variants reported in the literature (68% compared to 55%; Fisher's Exact  
125 test,  $p=0.0002$ ). Consequently there were also fewer LoF variants among the WD-  
126 ATP7B variants present in gnomAD (24% compared to 38%; Fisher's Exact test,  
127  $p<0.0001$ ).

128

129

## 130 **Predicted prevalence of WD-associated genotypes in the gnomAD populations**

131 Allele frequencies of all WD-*ATP7B* variants present in the gnomAD dataset were  
132 summed to give an estimate for the combined allele frequency of all WD-*ATP7B*  
133 variants in the general population, which we have termed the pathogenic allele  
134 frequency (PAF). This was done for the entire gnomAD population and also for the 8  
135 subpopulations that make up this dataset (Table 2). Assuming Hardy-Weinberg  
136 equilibrium and using the Hardy-Weinberg equation, the PAFs were used to  
137 calculate the pathogenic genotype frequencies (being homozygous or compound  
138 heterozygous for WD-*ATP7B* variants), the heterozygous genotype frequencies  
139 (being heterozygous for WD-*ATP7B* variants) and the carrier rates for these  
140 genotypes, expressed as one per “n” of the population (Table 2). The PAF in the  
141 whole gnomAD dataset was 2.0%, giving a pathogenic genotype rate (PGR) of 1 in  
142 2491 and heterozygous carrier rate of 1 in 25. The highest PAFs were seen in the  
143 Ashkenazi Jewish population (PAF 3.0%, PGR 1 in 1107) and the East Asian  
144 population (PAF 2.4%, PGR 1 in 1799) and the lowest in the African population  
145 (gnomAD: PAF 1.2%, PGR 1 in 7271).



146 **Table 2. Combined WD-ATP7B variant allele frequencies, genotype frequencies and carrier rates in the gnomAD**  
 147 **population**

|                                                     | gnomAD  |         |                     |            |                               |                       |         |                |         |
|-----------------------------------------------------|---------|---------|---------------------|------------|-------------------------------|-----------------------|---------|----------------|---------|
|                                                     | All     | African | Ashkenazi<br>Jewish | East Asian | European<br>(non-<br>Finnish) | European<br>(Finnish) | Latino  | South<br>Asian | Other   |
| Pathogenic<br>allele freq                           | 0.02004 | 0.01173 | 0.03005             | 0.02358    | 0.02278                       | 0.01744               | 0.01629 | 0.01546        | 0.02142 |
| Pathogenic<br>genotype freq                         | 0.00040 | 0.00014 | 0.00090             | 0.00056    | 0.00052                       | 0.00030               | 0.00027 | 0.00024        | 0.00046 |
| Heterozygous<br>genotype freq                       | 0.03927 | 0.02318 | 0.05830             | 0.04604    | 0.04452                       | 0.03427               | 0.03204 | 0.03044        | 0.04191 |
| Pathogenic<br>genotype<br>carrier rate <sup>a</sup> | 2491    | 7271    | 1107                | 1799       | 1927                          | 3289                  | 3770    | 4184           | 2180    |
| Heterozygous<br>carrier rate <sup>a</sup>           | 25      | 43      | 17                  | 22         | 22                            | 29                    | 31      | 33             | 24      |

148 <sup>a</sup> Pathogenic genotype rate and heterozygous carrier rate are expressed as 1 in “n” of the population.

149 The above estimates do not account for WD variants that are present in the gnomAD  
150 populations but have not been reported in the literature. We made the assumption  
151 that *ATP7B* LoF variants would almost certainly be causative of WD when in the  
152 homozygous state or compound heterozygous state with other pathogenic *ATP7B*  
153 variants. We identified an additional 51 LoF variants present in the gnomAD dataset  
154 not reported in the literature as associated with WD (Supporting Table S3).

155 The ExAC database, a forerunner of gnomAD, that contains approximately half the  
156 number of genomic sequences, also reports copy number variants (CNVs) from  
157 59,898 of the 60,706 exomes in the database [14]. We analysed the CNVs that  
158 intersected with the *ATP7B* gene and identified 10 deletions and 6 duplications that  
159 covered either all or part of the gene. The gnomAD database currently has no data  
160 on CNVs, however, as the ExAC database formed the basis for gnomAD we added  
161 frequency data derived from ExAC CNVs to our analysis. The CNV *deletions* were  
162 considered to be pathogenic and were included as large LoF deletions in subsequent  
163 PAF calculations (Supporting Table S3). As it was not straight forward to determine  
164 whether CNV *duplications* were pathogenic they were not included in the analysis.

165 The allele frequencies of the LoF variants and large LoF deletions were added to the  
166 gnomAD PAFs determined previously. The updated PAFs, genotype frequencies  
167 and carrier rates were calculated (Table 3). The additional LoF variants were only  
168 rarely encountered in the gnomAD populations and their inclusion did not contribute  
169 greatly to the overall PAFs and carrier rates, with only marginal increases (PAF  
170 2.0%, PGR 1 in 2387).

171 **Table 3. Combined WD-ATP7B plus LoF variant allele frequencies, genotype frequencies and carrier rates in the gnomAD**  
 172 **population**

|                                        | gnomAD  |         |                  |            |                        |                    |         |             |         |
|----------------------------------------|---------|---------|------------------|------------|------------------------|--------------------|---------|-------------|---------|
|                                        | All     | African | Ashkenazi Jewish | East Asian | European (non-Finnish) | European (Finnish) | Latino  | South Asian | Other   |
| Pathogenic allele freq                 | 0.02055 | 0.01245 | 0.03005          | 0.02369    | 0.02335                | 0.01775            | 0.01664 | 0.01591     | 0.02298 |
| Pathogenic genotype freq               | 0.00042 | 0.00016 | 0.00090          | 0.00056    | 0.00055                | 0.00031            | 0.00028 | 0.00025     | 0.00053 |
| Heterozygous genotype freq             | 0.04026 | 0.02459 | 0.05830          | 0.04627    | 0.04562                | 0.03486            | 0.03273 | 0.03131     | 0.04491 |
| Pathogenic genotype rate <sup>a</sup>  | 2367    | 6451    | 1107             | 1781       | 1833                   | 3176               | 3610    | 3952        | 1893    |
| Heterozygous carrier rate <sup>a</sup> | 25      | 41      | 17               | 22         | 22                     | 29                 | 31      | 32          | 22      |

173 <sup>a</sup> Pathogenic genotype rate and heterozygous carrier rate are expressed as 1 in “n” of the population.

## 174 **Identification of low penetrant or non-causative *ATP7B* variants**

175 Our estimate for the population prevalence of WD-*ATP7B* variants and consequently  
176 the predicted prevalence of WD in the gnomAD population of around 1 in 2400 with  
177 heterozygous carrier rate of 1 in 25 is considerably higher than the often quoted  
178 prevalence of 1 in 30,000 with 1 in 90 heterozygous carriers. It is, however, closer to  
179 the estimates obtained from the analysis of ceruloplasmin measurements in the  
180 Japanese and Korean populations [8, 9] and the result obtained by a genetic study of  
181 1000 controls in the UK population of 1 in 7000 [10]. These higher prevalence  
182 estimates and the estimate we obtained from the gnomAD population, however, do  
183 not appear to reflect the incidence of WD presenting to the clinic and suggest that  
184 either many WD patients remain undiagnosed or that some WD-*ATP7B* variants are  
185 not causative or have low penetrance.

186 We addressed the issue of variant penetrance using two approaches: firstly, by  
187 comparing the allele frequencies of individual variants in the gnomAD dataset with  
188 the frequency with which these variants have been reported in association with WD  
189 in the literature; and secondly by utilizing VEP algorithms.

190 In the first approach, if the allele frequency in the gnomAD dataset was such that  
191 more reports would have been expected in the literature (analysed broadly by  
192 number of references) then the variant was considered as a '*probable* low penetrant'  
193 variant. Thus, when we ranked WD-*ATP7B* variants according to their allele  
194 frequencies in the gnomAD population we noticed that the p.His1069Gln variant, the  
195 most common WD-associated variant in European populations, was ranked number  
196 6 in the entire gnomAD dataset, number 5 in the European (Finnish and non-Finnish)  
197 subpopulations and number 3 in the Ashkenazi Jewish subpopulation. Thus there

198 were several *WD-ATP7B* variants with higher allele frequencies in these populations  
199 that would be expected to be detected regularly in WD patients. The 5 *WD-ATP7B*  
200 variants that ranked higher than p.His1069Gln in the gnomAD dataset were  
201 p.Val536Ala, p.Thr1434Met, p.Met665Ile, p.Thr991Met and p.Pro1379Ser. These  
202 variants have only been reported in a small number of cases of WD and hence their  
203 causality and/or penetrance is in question.

204 We also attempted to identify variants that have questionable causality/penetrance  
205 by comparing them against a recent review article that analysed the geographic  
206 distribution of *ATP7B* variants that have been reported in WD patients [15]. This  
207 review lists the most commonly encountered *ATP7B* variants in WD patients from  
208 geographic regions around the world. Any variants reported in this article were  
209 considered to have high penetrance. Interestingly, the 5 variants with gnomAD allele  
210 frequencies higher than p.His1069Gln were not listed in the Gomes et al. review [15]  
211 suggesting that they are not commonly associated with WD.

212 We formalised this approach by analysing data from the WDMD. The WDMD lists all  
213 references that have reported particular variants. We counted the number of  
214 references associated with each *WD-ATP7B* variant (Supporting Table S1). The  
215 p.His1069Gln variant is listed against 46 references, the highest number for any  
216 variant in the WDMD. In contrast the 5 variants with higher gnomAD allele  
217 frequencies have only 1 or 2 associated references in the WDMD (Supporting Table  
218 S1), suggesting that their penetrance is low. We plotted gnomAD allele frequency  
219 against number of WDMD references for all *WD-ATP7B* variants and highlighted  
220 those variants that were reported by Gomes et al. [15] (Figure 1A). This analysis  
221 showed that there were a number of variants with relatively high allele frequencies in  
222 gnomAD, not reported in the Gomes et al. review paper and with few references in

223 the WDMD. These variants are clustered towards the left-hand side of the graph in  
224 Figure 1A. On the basis of this analysis we classified 13 variants as having '*probable*  
225 low penetrance' (Table 4).

226 **Table 4: WD-ATP7B variants (found in the gnomAD dataset) with probable or possible low penetrance**

| Coding DNA change | Protein change | Domain          | gnomAD allele frequency | VEST3 score | Penetrance   | References |
|-------------------|----------------|-----------------|-------------------------|-------------|--------------|------------|
| c.406A>G          | p.Arg136Gly    | MBD1-2 linker   | 0.000313                | 0.182 *     | Probable low | [16]       |
| c.1555G>A         | p.Val519Met    | MBD5            | 0.000588                | 0.759       | Probable low | [17]       |
| c.1607T>C         | p.Val536Ala    | MBD5            | 0.003390                | 0.652       | Probable low | [18]       |
| c.1922T>C         | p.Leu641Ser    | MBD6-TMA linker | 0.000462                | 0.893       | Probable low | [19, 20]   |
| c.1947-4C>T       | .              |                 | 0.000576                |             | Probable low | [21, 22]   |
| c.1995G>A         | p.Met665Ile    | TMA             | 0.001423                | 0.711       | Probable low | [23]       |
| c.2605G>A         | p.Gly869Arg    | A domain        | 0.000718                | 0.911       | Probable low | [24-27]    |
| c.2972C>T         | p.Thr991Met    | TM4             | 0.001259                | 0.96        | Probable low | [19, 25]   |
| c.3243+5G>A       | .              |                 | 0.000344                |             | Probable low | [28]       |
| c.3688A>G         | p.Ile1230Val   | P domain        | 0.000325                | 0.818       | Probable low | [18]       |
| c.4021+3A>G       | .              |                 | 0.000325                |             | Probable low | [29]       |
| c.4135C>T         | p.Pro1379Ser   | C-terminus      | 0.001063                | 0.864       | Probable low | [19]       |
| c.4301C>T         | p.Thr1434Met   | C-terminus      | 0.002060                | 0.249 *     | Probable low | [30, 31]   |
| c.122A>G          | p.Asn41Ser     | N-terminus      | 0.000224                | 0.149       | Possible low | [32]       |
| c.677G>A          | p.Arg226Gln    | MBD2-3 linker   | 0.000012                | 0.119       | Possible low | WDMD       |
| c.748G>A          | p.Gly250Arg    | MBD2-3 linker   | 0.000040                | 0.404       | Possible low | [33]       |
| c.997G>A          | p.Gly333Arg    | MBD3-4 linker   | 0.000004                | 0.124       | Possible low | [29]       |
| c.2183A>G         | p.Asn728Ser    | TM1-2           | 0.000032                | 0.203       | Possible low | [34]       |
| c.3490G>A         | p.Asp1164Asn   | N domain        | 0.000012                | 0.44        | Possible low | [18]       |

|           |              |          |          |       |              |          |
|-----------|--------------|----------|----------|-------|--------------|----------|
| c.3599A>C | p.Gln1200Pro | P domain | 0.000020 | 0.299 | Possible low | [35]     |
| c.3886G>A | p.Asp1296Asn | P domain | 0.000202 | 0.361 | Possible low | [36, 37] |
| c.3971A>G | p.Asn1324Ser | TM5-6    | 0.000004 | 0.397 | Possible low | [38]     |

227 \* Probable low penetrant variants also classified as possible low penetrant variants based on a low VEST3 score.



## 228 **Comparison of variant effect prediction algorithms**

229 VEP algorithms are used extensively to predict whether amino acid substitutions  
230 (missense variants) are likely to alter protein function and hence contribute to  
231 disease. SIFT and Polyphen2 are two of the mostly widely used algorithms,  
232 however, in recent years newer algorithms have been developed. The output from  
233 wANNOVAR included results from 16 VEP algorithms. We tested the performance of  
234 these algorithms in discriminating between the 400 WD-*ATP7B* missense variants  
235 (identified in this study through literature review as associated with WD) and 786  
236 missense variants (of 844 in total) that were identified in the gnomAD dataset but  
237 have not been previously reported in WD patients, termed non-WD-*ATP7B* missense  
238 variants. The scores for each of the algorithms were compared between the 2  
239 groups (Supporting Figure S1) and their performance in discriminating between the 2  
240 groups assessed using ROC curve analyses (Supporting Figure S2). Mean and  
241 median scores were compared between the two groups and the differences were  
242 statistically different for each algorithm (Supporting Figure S1, t-test  $p < 0.01$ , Mann  
243 Whitney test  $p < 0.0001$ ). ROC curve analyses revealed area under the ROC curves  
244 that ranged between 0.5399 and 0.8821 (Supporting Figure S2).

245 The algorithm that performed the best at discriminating between WD and non-WD  
246 missense variants was VEST3 [39]. The median VEST3 score for WD missense  
247 variants was 0.957 compared with 0.404 for non-WD missense variants (Mann-  
248 Whitney test  $p < 0.0001$ , AUROC 0.8821). None of the WD-*ATP7B* missense variants  
249 reported in the Gomes et al. review paper had VEST3 scores of less than 0.5 and  
250 only one variant with greater than 2 references in the WDMD had a VEST3 score of  
251 less than 0.5, indicating that the VEST3 score performs very well at discriminating  
252 between WD and non-WD *ATP7B* missense variants. We classified WD-*ATP7B*

253 missense variants found in the WDMD and in our literature search as '*possible* low  
254 penetrance' if they had a VEST3 score of <0.5 (Figure 1B). There were 11 such  
255 variants in the gnomAD dataset that were contributing to our initial estimates of WD  
256 prevalence (Table 4). Two of these variants were also classified as *probable* low  
257 penetrance in the previous analysis based on the number of publications.

258

259 **Prevalence of WD-*ATP7B* variants in the gnomAD dataset after removing**  
260 **variants with probable or possible low penetrance**

261 We recalculated the PAFs, genotype frequencies and carrier rates after excluding  
262 the variants we identified as having probable or possible low penetrance. Exclusion  
263 from the analysis of the 13 WD-*ATP7B* variants with *probable* low penetrance, based  
264 on relatively high allele frequencies but low numbers of reports in WD patients,  
265 resulted in a significant reduction in the predicted prevalence of WD. The updated  
266 PAF after exclusion of these variants was 0.76% in the gnomAD dataset, with PGR  
267 of 1 in 16,832. The updated PAFs, genotype frequencies and carrier rates, including  
268 the results for each subpopulation can be seen in Table 5.

269 **Table 5. Combined WD-ATP7B plus LoF variant allele frequencies, genotype frequencies and carrier rates in the gnomAD**  
 270 **population after exclusion of those variants with *probable* low penetrance.**

|                                                     | gnomAD   |          |                     |            |                               |                       |          |                |          |
|-----------------------------------------------------|----------|----------|---------------------|------------|-------------------------------|-----------------------|----------|----------------|----------|
|                                                     | All      | African  | Ashkenazi<br>Jewish | East Asian | European<br>(non-<br>Finnish) | European<br>(Finnish) | Latino   | South<br>Asian | Other    |
| Pathogenic<br>allele freq                           | 0.007708 | 0.003874 | 0.014093            | 0.015037   | 0.007884                      | 0.004326              | 0.007724 | 0.006127       | 0.007902 |
| Pathogenic<br>genotype freq                         | 0.000059 | 0.000015 | 0.000199            | 0.000226   | 0.000062                      | 0.000019              | 0.000060 | 0.000038       | 0.000062 |
| Heterozygous<br>genotype freq                       | 0.015297 | 0.007718 | 0.027790            | 0.029621   | 0.015645                      | 0.008615              | 0.015328 | 0.012179       | 0.015680 |
| Pathogenic<br>genotype<br>carrier rate <sup>a</sup> | 16832    | 66625    | 5035                | 4423       | 16086                         | 53427                 | 16763    | 26636          | 16014    |
| Heterozygous<br>carrier rate <sup>a</sup>           | 65       | 130      | 36                  | 34         | 64                            | 116                   | 65       | 82             | 64       |

271 <sup>a</sup> Pathogenic genotype rate and heterozygous carrier rate are expressed as 1 in “n” of the population.

272 The remaining 9 variants with *possible* low penetrance based on VEST3 score had  
273 lower allele frequencies and consequently their exclusion from the analyses had less  
274 effect on the predicted prevalence of WD. After exclusion of these variants the  
275 updated PAF decreased to 0.71% for the gnomAD dataset, with PGR of 1 in 19,457.  
276 The updated PAFs, genotype frequencies and carrier rates, including the results for  
277 each subpopulation can be seen in Table 6.

278 **Table 6. Combined WD-ATP7B plus LoF variant allele frequencies, genotype frequencies and carrier rates in the gnomAD**  
 279 **population after exclusion of those variants with *probable* and *possible* low penetrance.**

|                                        | gnomAD   |          |                  |            |                        |                    |          |             |          |
|----------------------------------------|----------|----------|------------------|------------|------------------------|--------------------|----------|-------------|----------|
|                                        | All      | African  | Ashkenazi Jewish | East Asian | European (non-Finnish) | European (Finnish) | Latino   | South Asian | Other    |
| Pathogenic allele freq                 | 0.007169 | 0.003583 | 0.014093         | 0.013720   | 0.007390               | 0.002613           | 0.007694 | 0.005932    | 0.007438 |
| Pathogenic genotype freq               | 0.000051 | 0.000013 | 0.000199         | 0.000188   | 0.000055               | 0.000007           | 0.000059 | 0.000035    | 0.000055 |
| Heterozygous genotype freq             | 0.014235 | 0.007140 | 0.027790         | 0.027064   | 0.014672               | 0.005212           | 0.015269 | 0.011794    | 0.014765 |
| Pathogenic genotype rate <sup>a</sup>  | 19457    | 77903    | 5035             | 5312       | 18309                  | 146467             | 16893    | 28415       | 18076    |
| Heterozygous carrier rate <sup>a</sup> | 70       | 140      | 36               | 37         | 68                     | 192                | 65       | 85          | 68       |

280 <sup>a</sup> Pathogenic genotype rate and heterozygous carrier rate are expressed as 1 in “n” of the population.

## 281 **The mutational landscape of *ATP7B***

282 We noticed a difference in the distribution of WD-*ATP7B* missense variants across the  
283 coding region as seen in other studies [40, 41]. In particular, there appear to be very few  
284 WD-*ATP7B* missense variants located in the first one-third of the protein coding sequence,  
285 the region that encodes metal binding domains (MBDs) 1 to 4. This prompted us to  
286 measure the distribution of missense and LoF variants in the regions encoding the amino-  
287 terminal 480 amino acids (encompassing MBDs 1 to 4) and the carboxy-terminal 985  
288 amino acids (encompassing MBDs 5 and 6, and the remainder of the *ATP7B* functional  
289 domains). The proportion of LoF variants in the amino-terminal portion of the *ATP7B*  
290 coding sequence (27%) was close to the expected 33% and did not significantly deviate  
291 from the expected ratio (Figure 2A; Fisher's Exact test:  $p=0.1254$ ). The proportion of non-  
292 WD missense variants in the amino-terminal portion of the coding sequence (37%) was  
293 slightly higher than the expected 33% but did not quite reach statistical significance (Figure  
294 2A; Fisher's Exact test:  $p=0.0507$ ). In contrast the proportion of WD missense variants in  
295 the amino-terminal portion of the coding sequence was very low (17 out of 400 variants,  
296 4.25%), significantly lower than the expected ratio (Figure 2A; Fisher's Exact test:  
297  $p<0.0001$ ).

298 We also analysed the distribution of variants across the various functional domains of the  
299 *ATP7B* coding region (Figure 2B) and found that, while the LoF and non-WD missense  
300 variants are distributed fairly uniformly across the coding region, the number of WD  
301 missense variants are lower in all amino-terminal domains up to and including MBD6. In  
302 most of the carboxy-terminal domains WD missense variants are over-represented and  
303 are particularly prevalent in the phosphorylation (P) and nucleotide (N) domains and  
304 transmembrane (TM) domains 1,2,4,5 and 6 (Figure 2B).

305 We also analysed the predicted pathogenicity of missense variants across the *ATP7B*  
306 coding sequence by plotting VEST3 score against coding sequence position for both WD  
307 and non-WD missense variants (Figure 2C). There was a striking difference in the pattern  
308 of VEST3 scores for both WD and non-WD missense variants across the protein coding  
309 sequence. WD missense variants in the C-terminal two-thirds of the coding sequence had  
310 higher VEST3 scores compared to those in the N-terminal one-third and were clustered  
311 into the main functional domains of the protein including the TM domains, A, P and N  
312 domains (Figure 2C). It is of note that the linker region between TM domains 3 and 4, the  
313 extended loop within the N domain and the carboxy-terminal tail of the protein are, similar  
314 to the amino-terminal one-third of the protein, relatively lacking in WD missense variants,  
315 and VEST3 scores in these regions are lower (Figure 2C).

## 316 **Discussion**

317 We have predicted the prevalence of WD in global populations using publically available  
318 NGS data. We used *ATP7B* variant data from the WDMD and updated this from a  
319 literature search done between 2010 and 2017. The 732 WD-associated variants identified  
320 were used to screen the NGS dataset.

321 Nearly one-third (32%) of the WD-*ATP7B* variants were present in the gnomAD dataset. It  
322 is of note that the majority of WD-*ATP7B* variants found in the gnomAD dataset were  
323 derived from the WDMD, and only 14% of the variants that contributed to our prevalence  
324 estimates were reported in the literature since the WDMD was last updated in 2010. The  
325 remaining two-thirds of WD-*ATP7B* variants not present in the gnomAD dataset were  
326 generally reported in fewer publications and hence we would predict them to be rarely  
327 encountered in the general population or limited to populations not represented in the  
328 gnomAD dataset.

329 Our initial estimates for population prevalence of WD included frequencies of all variants  
330 that had been reported as disease causing in the WDMD and more recent literature, with  
331 no adjustments for penetrance. We did include LoF variants that were present in the  
332 gnomAD dataset but had not been reported in WD patients. This initial estimate predicted  
333 that approximately 1 in 2400 people would have pathogenic genotypes and would be at  
334 risk of developing WD, with 1 in 25 people being carriers of pathogenic variants.

335 This initial prevalence estimate did not take into account variant penetrance that may lead  
336 to people carrying WD genotypes either not expressing the disease or having milder  
337 phenotypes. Further analysis of the data showed that this initial estimate was likely  
338 distorted by the presence of variants, with relatively high allele frequencies, that have been  
339 reported as disease causing in only a small number of WD patients. After removal of these  
340 'probable low penetrant' variants from the analysis the predicted prevalence of WD fell



341 dramatically to levels more consistent with traditional estimates. Review of the publications  
342 reporting the 13 variants classified as *probable* low penetrance confirm that given their  
343 frequencies in the gnomAD dataset (0.01% to 0.03% of ~240,000 chromosomes) the  
344 number of publications describing them in WD cohorts is much lower than expected [16-  
345 31]. The publications reporting these variants also include data suggesting that some have  
346 low penetrance. The c.1947-4C>T variant is reported as a polymorphism in two  
347 publications [21, 22] and appears to have been incorrectly classified as disease causing in  
348 the WDMD. The c.4021+3A>G [29] and p.Thr1434Met [30] variants were identified in WD  
349 patients who were also homozygous or compound heterozygous for other *ATP7B* variants  
350 that could account for their phenotypes. A publication reporting p.Gly869Arg suggests that  
351 it has a more benign clinical course [24], while p.Ile1230Val had an uncertain classification  
352 [18]. Publications reporting the remainder of the *probable* low penetrant variants do not  
353 give clinical details of the patients involved, so that it is difficult to assess their  
354 pathogenicity.

355 We also used VEP algorithms to assist in identifying further WD-associated variants that  
356 may have low penetrance. This analysis showed that the VEST3 algorithm performs very  
357 well in discriminating between WD and non-WD missense variants. After removing  
358 variants with low VEST3 scores the predicted prevalence of WD genotypes fell further but  
359 because these variants were relatively infrequent the reduction was marginal. While the  
360 removal of variants with a high gnomAD population prevalence not reflected in reports of  
361 WD patients is well justified, the removal based on VEP algorithms should be taken with  
362 some caution, since none of the algorithms are 100% accurate at discriminating between  
363 pathogenic and non-pathogenic variants.

364 We included LoF variants, that had not been previously reported in the literature as  
365 causing WD, in our prevalence calculations. While the majority of these are well justified  
366 for inclusion, it is possible that variants that disrupt the protein coding sequence close to

367 the carboxy-terminus may not be pathogenic. However, the number of these variants and  
368 their frequencies were very small, and their inclusion does not greatly affect our final  
369 prevalence estimate.

370 Based on our analysis of WD-*ATP7B* variant frequencies and considering the above  
371 strategies to account for low penetrant variants our final prediction for the population  
372 prevalence of WD is in the range of 1 in 17,000 to 1 in 20,000 of the global population with  
373 1 in 65 to 1 in 70 as heterozygous carriers. This gives a higher prevalence than the  
374 traditional estimate of 1 in 30,000 but is not as high as estimates from East Asia [8, 9] and  
375 the UK [10].

376 It is of note that the predicted prevalence was not uniform across the 8 gnomAD  
377 subpopulations. The highest prevalence was observed in the Ashkenazi Jewish and East  
378 Asian subpopulations, both being close to 1 in 5000 with 1 in 36 heterozygous carriers. In  
379 the Ashkenazi Jewish population the most prevalent mutation was p.His1069Gln. This was  
380 also the most prevalent mutation in the European population and reflects the likely origin of  
381 this mutation in the ancestors of Eastern Europeans [15]. In East Asians the most  
382 prevalent mutations were p.Thr935Met and p.Arg778Leu, both with similar allele  
383 frequencies. The lowest prevalence rate was in Africans, with around 1 in 78,000 predicted  
384 to carry WD-associated genotypes. This may represent a real low prevalence rate but may  
385 equally represent a lack of research into WD in the African continent and the consequent  
386 absence of African WD variants from our analysis.

387 Our population prevalence estimates are lower than two ceruloplasmin screening studies  
388 in children from Japan and Korea and a genetic study from the UK. The studies from  
389 Japan and Korea [8, 9] that predicted prevalences of 1 in 1500 and 1 in 3000 respectively,  
390 were relatively small pilot studies that identified only 1 or 2 children with WD. Hence the  
391 extrapolation of this data to the whole population may not be accurate. The genetic study

392 from the UK [10] sequenced all *ATP7B* exons in over 1000 controls. The methodology was  
393 similar to the study presented here in that the frequencies of disease-causing variants  
394 present in the WDMD or detected by the local diagnostic genetics service were used to  
395 calculate prevalence rates. This study also used *in silico* analysis to identify further  
396 variants that may be disease causing and to exclude other variants that had questionable  
397 pathogenicity. However, their inclusion and exclusion criteria were slightly different to ours.  
398 Hence reanalysis of the Coffey et al. [10] data using our criteria would likely lead to a lower  
399 predicted prevalence of WD in the UK.

400 While this study was in preparation for publication, Gao et al. [42] reported a similar study  
401 where they estimated WD prevalence based on the frequency of variants in the gnomAD  
402 dataset. While their method for estimating prevalence was similar to our approach, their  
403 analysis of penetrance was different. Hence their final prevalence estimate of around 1 in  
404 7000 is significantly higher than ours. To address the issue of low penetrant variants, they  
405 used an equation reported by Whiffin et al. [43] that calculates a maximum credible  
406 population allele frequency and filtered out all variants with allele frequencies higher than  
407 this. This method only removed 4 high frequency variants from their analysis. Our  
408 approach, which was based on a combination of high allele frequencies, the geographic  
409 distribution of WD-*ATP7B* variants and the number of reports of *ATP7B* variants in the WD  
410 literature was more stringent and removed 13 variants which were deemed to be low  
411 penetrant and at too high frequency to be contributing to the global prevalence of WD. We  
412 believe that our approach to address variant penetrance and the subsequent estimation of  
413 WD prevalence is more meaningful. For example, 3 of the top 5 variants that contributed to  
414 WD prevalence in the Gao et al. [42] study (p.Thr991Met, p.Pro1379Ser and p.Gly869Arg)  
415 are reported in very few WD publications, with some suggesting a benign clinical course in  
416 patients with these variants [19, 24-27]. Re-analysis of the Gao et al. [42] data with filtering  
417 of variants identified in this study as being probable low penetrant returns a predicted WD

418 prevalence more similar to our estimate, at approximately 1 in 20,000. These predictions  
419 are more closely aligned with traditional estimates and suggest that reduced variant  
420 penetrance plays a much bigger role in the observed disparity in prevalence estimates  
421 between genetic and epidemiological studies [42].

422 Using the gnomAD and VEP data, we were also able to analyse the mutational landscape  
423 of *ATP7B* and clearly show that missense variants associated with WD cluster into the  
424 functional domains located in the carboxy-terminal two-thirds of the protein, with relative  
425 sparing of the amino-terminal MBDs. This indicates that the six MDBs are more permissive  
426 to mutations and that variants identified in these regions are less likely to be pathogenic.

427 This study emphasises the difficulty in assigning WD prevalence from population datasets.  
428 Accurate prevalence estimates depend upon an assessment of the penetrance of  
429 individual genetic variants, not a straightforward task. Studies to date have not clearly  
430 shown genotype/phenotype relationships, and with compound heterozygosity being the  
431 most frequent pattern and there being over 700 *ATP7B* variants this is not surprising.  
432 Other approaches will be needed to investigate the basis of the phenotype, some  
433 dependent on mutations but some on other features [3]. It is always a concern that the  
434 diagnosis of WD is not made or considered by clinicians. The higher prevalence of WD in  
435 some populations is confirmed here and should be used to emphasise their increased risk.

436 In conclusion, we have used NGS data to analyse the prevalence of WD in global  
437 populations, with a concerted approach to evaluating variant penetrance. This study  
438 highlights the importance of considering variant penetrance when assigning causality to  
439 genetic variants. Variants that have relatively high allele frequencies but low frequencies in  
440 patient cohorts are likely to have low penetrance. Other potential data to consider are VEP  
441 algorithm scores and the position of missense variants in the coding sequence. Large  
442 NGS datasets and improved VEP algorithms now allow us to evaluate with more accuracy

443 the pathogenicity of genetic variants. The penetrance of *ATP7B* variants is likely to be on a  
444 spectrum: LoF variants are known to have high penetrance, whereas, some missense  
445 variants are thought to have lower penetrance [2]. WD-*ATP7B* missense variants are more  
446 likely to be in the carboxy-terminal two-thirds of the coding sequence, in regions encoding  
447 the functional domains of the protein. It would be valuable to determine the effects that low  
448 penetrant variants identified here have on ATP7B protein function and whether individuals  
449 carrying genotypes containing these variants have milder abnormalities of copper  
450 homeostasis, later onset or less severe forms of WD. Finally, this approach to predicting  
451 the prevalence of WD and penetrance of variants could be applied to other Mendelian  
452 inherited disorders.

## 453 **Methods**

### 454 **Catalogue of Wilson disease-associated *ATP7B* variants**

455 Initially, details of all variants classified as “disease-causing variant” (DV) in the Wilson  
456 Disease Mutation Database (WDMD), hosted at the University of Alberta  
457 (<http://www.wilsondisease.med.ualberta.ca/>) were downloaded. As the WDMD has not  
458 been updated since 2010 a further literature search was carried out to identify WD-  
459 associated *ATP7B* variants that have been reported between the last update of the WDMD  
460 and April 2017, using the search terms *ATP7B* and mutation in the PubMed database  
461 (<https://www.ncbi.nlm.nih.gov/pubmed>). The Human Genome Variation Society (HGVS)  
462 nomenclature for each variant was verified using the Mutalyzer Name Checker program  
463 (<https://mutalyzer.nl/>) [44]. Duplicate entries were removed and any mistakes in  
464 nomenclature were corrected after comparison with the original publications. All HGVS  
465 formatted variants were then converted into chromosomal coordinates (Homo sapiens –  
466 GRCh37 (hg19)) using the Mutalyzer Position Converter program. A variant call format  
467 (VCF) file containing all of the WD-associated *ATP7B* variants was then constructed using  
468 a combination of output from the Mutalyzer Position Converter and Galaxy bioinformatic  
469 tools (<https://galaxyproject.org>) [45].

470

### 471 **Prevalence of Wilson disease-associated *ATP7B* variants**

472 All variants in the *ATP7B* gene (Ensembl transcript ID ENST00000242839) were  
473 downloaded from the gnomAD (<http://gnomad.broadinstitute.org/>) browser [13]. The WD-  
474 associated *ATP7B* variants (see above) were compared with the gnomAD *ATP7B* variants  
475 and allele frequency data were extracted for those variants with VCF descriptions that  
476 matched exactly. Allele frequency data were also extracted from the gnomAD dataset for  
477 variants that had not been previously reported in WD patients but were predicted to cause

478 loss of function (LoF) of the ATP7B protein. These LoF variants included frameshift, splice  
479 acceptor, splice donor, start lost and stop gained mutations.

480 Pathogenic *ATP7B* allele frequencies were determined in the gnomAD dataset by  
481 summing all of the allele frequencies for variants classified as WD-associated. Predicted  
482 pathogenic *ATP7B* genotype frequencies, heterozygote frequencies and carrier rates were  
483 calculated from allele frequencies using the Hardy-Weinberg equation.

484

### 485 **In silico analyses of variant pathogenicity**

486 The functional consequence of WD-*ATP7B* missense variants and gnomAD-derived  
487 *ATP7B* missense variants (that had not been previously associated with WD) was  
488 assessed using the wANNOVAR program (<http://wannovar.wglab.org/>), which provides  
489 scores for 16 VEP algorithms. The performance of these 16 algorithms for predicting WD-  
490 associated variants was analysed using receiver operating characteristic (ROC) curve  
491 analysis. The best performing algorithm (VEST3)[39] was used, together with the gnomAD  
492 frequency data, data from the WDMD and other published data [15] to predict the  
493 pathogenicity of WD-associated *ATP7B* variants and refine the pathogenic genotype  
494 prevalence estimates.

495

### 496 **Acknowledgements**

497 We would like to acknowledge the curators of the Wilson Disease Mutation Database,  
498 University of Alberta for the use of data in this study.

499

500

## 501 **References**

- 502 1. Ala A, Walker AP, Ashkan K, Dooley JS, Schilsky ML. Wilson's disease. *Lancet*.  
503 2007;369(9559):397-408.
- 504 2. Chang IJ, Hahn SH. The genetics of Wilson disease. *Handb Clin Neurol*.  
505 2017;142:19-34.
- 506 3. Ferenci P, Stremmel W, Czlonkowska A, Szalay F, Viveiros A, Stattermayer AF, et  
507 al. Age,sex, but not ATP7B genotype effectively influences the clinical phenotype of  
508 Wilson disease. *Hepatology*. 2018.
- 509 4. Medici V, Weiss KH. Genetic and environmental modifiers of Wilson disease.  
510 *Handb Clin Neurol*. 2017;142:35-41.
- 511 5. Scheinberg IH, Sternlieb I. Wilson's disease. Philadelphia: Saunders; 1984. xii, 171  
512 p., 2 leaves of plates p.
- 513 6. Bachmann H, Lossner J, Gruss B, Ruchholtz U. [The epidemiology of Wilson's  
514 disease in the German Democratic Republic and current problems from the viewpoint of  
515 population genetics]. *Psychiatr Neurol Med Psychol (Leipz)*. 1979;31(7):393-400.
- 516 7. Saito T. An assessment of efficiency in potential screening for Wilson's disease. *J*  
517 *Epidemiol Community Health*. 1981;35(4):274-80.
- 518 8. Ohura T, Abukawa D, Shiraishi H, Yamaguchi A, Arashima S, Hiyamuta S, et al.  
519 Pilot study of screening for Wilson disease using dried blood spots obtained from children  
520 seen at outpatient clinics. *J Inherit Metab Dis*. 1999;22(1):74-80.
- 521 9. Hahn SH, Lee SY, Jang YJ, Kim SN, Shin HC, Park SY, et al. Pilot study of mass  
522 screening for Wilson's disease in Korea. *Mol Genet Metab*. 2002;76(2):133-6.
- 523 10. Coffey AJ, Durkie M, Hague S, McLay K, Emmerson J, Lo C, et al. A genetic study  
524 of Wilson's disease in the United Kingdom. *Brain*. 2013;136(Pt 5):1476-87.



- 525 11. Wallace DF, Subramaniam VN. The global prevalence of HFE and non-HFE  
526 hemochromatosis estimated from analysis of next-generation sequencing data. *Genet*  
527 *Med.* 2016;18(6):618-26.
- 528 12. Hughes BG, Harrison PM, Hekimi S. Estimating the occurrence of primary  
529 ubiquinone deficiency by analysis of large-scale sequencing data. *Sci Rep.*  
530 2017;7(1):17744.
- 531 13. Lek M, Karczewski KJ, Minikel EV, Samocha KE, Banks E, Fennell T, et al.  
532 Analysis of protein-coding genetic variation in 60,706 humans. *Nature.*  
533 2016;536(7616):285-91.
- 534 14. Ruderfer DM, Hamamsy T, Lek M, Karczewski KJ, Kavanagh D, Samocha KE, et  
535 al. Patterns of genic intolerance of rare copy number variation in 59,898 human exomes.  
536 *Nat Genet.* 2016;48(10):1107-11.
- 537 15. Gomes A, Dedoussis GV. Geographic distribution of ATP7B mutations in Wilson  
538 disease. *Ann Hum Biol.* 2016;43(1):1-8.
- 539 16. Mukherjee S, Dutta S, Majumdar S, Biswas T, Jaiswal P, Sengupta M, et al.  
540 Genetic defects in Indian Wilson disease patients and genotype-phenotype correlation.  
541 *Parkinsonism Relat Disord.* 2014;20(1):75-81.
- 542 17. Kroll CA, Ferber MJ, Dawson BD, Jacobson RM, Mensink KA, Lorey F, et al.  
543 Retrospective determination of ceruloplasmin in newborn screening blood spots of patients  
544 with Wilson disease. *Mol Genet Metab.* 2006;89(1-2):134-8.
- 545 18. Davies LP, Macintyre G, Cox DW. New mutations in the Wilson disease gene,  
546 ATP7B: implications for molecular testing. *Genet Test.* 2008;12(1):139-45.
- 547 19. Cox DW, Prat L, Walshe JM, Heathcote J, Gaffney D. Twenty-four novel mutations  
548 in Wilson disease patients of predominantly European ancestry. *Hum Mutat.*  
549 2005;26(3):280.

- 550 20. Vrabelova S, Letocha O, Borsky M, Kozak L. Mutation analysis of the ATP7B gene  
551 and genotype/phenotype correlation in 227 patients with Wilson disease. *Mol Genet*  
552 *Metab.* 2005;86(1-2):277-85.
- 553 21. Kim EK, Yoo OJ, Song KY, Yoo HW, Choi SY, Cho SW, et al. Identification of three  
554 novel mutations and a high frequency of the Arg778Leu mutation in Korean patients with  
555 Wilson disease. *Hum Mutat.* 1998;11(4):275-8.
- 556 22. Okada T, Shiono Y, Hayashi H, Satoh H, Sawada T, Suzuki A, et al. Mutational  
557 analysis of ATP7B and genotype-phenotype correlation in Japanese with Wilson's  
558 disease. *Hum Mutat.* 2000;15(5):454-62.
- 559 23. Loudianos G, Dessi V, Lovicu M, Angius A, Nurchi A, Sturniolo GC, et al. Further  
560 delineation of the molecular pathology of Wilson disease in the Mediterranean population.  
561 *Hum Mutat.* 1998;12(2):89-94.
- 562 24. Garcia-Villarreal L, Daniels S, Shaw SH, Cotton D, Galvin M, Geskes J, et al. High  
563 prevalence of the very rare Wilson disease gene mutation Leu708Pro in the Island of Gran  
564 Canaria (Canary Islands, Spain): a genetic and clinical study. *Hepatology.*  
565 2000;32(6):1329-36.
- 566 25. Lepori MB, Lovicu M, Dessi V, Zappu A, Incollu S, Zancan L, et al. Twenty-four  
567 novel mutations in Wilson disease patients of predominantly Italian origin. *Genet Test.*  
568 2007;11(3):328-32.
- 569 26. Margarit E, Bach V, Gomez D, Bruguera M, Jara P, Queralt R, et al. Mutation  
570 analysis of Wilson disease in the Spanish population -- identification of a prevalent  
571 substitution and eight novel mutations in the ATP7B gene. *Clin Genet.* 2005;68(1):61-8.
- 572 27. Shah AB, Chernov I, Zhang HT, Ross BM, Das K, Lutsenko S, et al. Identification  
573 and analysis of mutations in the Wilson disease gene (ATP7B): population frequencies,  
574 genotype-phenotype correlation, and functional analyses. *Am J Hum Genet.*  
575 1997;61(2):317-28.

- 576 28. Aggarwal A, Chandhok G, Todorov T, Parekh S, Tilve S, Zibert A, et al. Wilson  
577 disease mutation pattern with genotype-phenotype correlations from Western India:  
578 confirmation of p.C271\* as a common Indian mutation and identification of 14 novel  
579 mutations. *Ann Hum Genet.* 2013;77(4):299-307.
- 580 29. Santhosh S, Shaji RV, Eapen CE, Jayanthi V, Malathi S, Chandy M, et al. ATP7B  
581 mutations in families in a predominantly Southern Indian cohort of Wilson's disease  
582 patients. *Indian J Gastroenterol.* 2006;25(6):277-82.
- 583 30. Abdelghaffar TY, Elsayed SM, Elsobky E, Bochow B, Buttner J, Schmidt H.  
584 Mutational analysis of ATP7B gene in Egyptian children with Wilson disease: 12 novel  
585 mutations. *J Hum Genet.* 2008;53(8):681-7.
- 586 31. Loudianos G, Dessi V, Lovicu M, Angius A, Altuntas B, Giacchino R, et al. Mutation  
587 analysis in patients of Mediterranean descent with Wilson disease: identification of 19  
588 novel mutations. *J Med Genet.* 1999;36(11):833-6.
- 589 32. Deguti MM, Genschel J, Cancado EL, Barbosa ER, Bochow B, Mucenic M, et al.  
590 Wilson disease: novel mutations in the ATP7B gene and clinical correlation in Brazilian  
591 patients. *Hum Mutat.* 2004;23(4):398.
- 592 33. Hua R, Hua F, Jiao Y, Pan Y, Yang X, Peng S, et al. Mutational analysis of ATP7B  
593 in Chinese Wilson disease patients. *Am J Transl Res.* 2016;8(6):2851-61.
- 594 34. Yuan ZF, Wu W, Yu YL, Shen J, Mao SS, Gao F, et al. Novel mutations of the  
595 ATP7B gene in Han Chinese families with pre-symptomatic Wilson's disease. *World J*  
596 *Pediatr.* 2015;11(3):255-60.
- 597 35. Bost M, Lachaux A, Accominotti M, Vandenberghe A. Mutation screening and  
598 genotype-phenotype correlation in 32 families with Wilson disease. *J Trace Elem Exp*  
599 *Med.* 1999;12(4):321-9.

- 600 36. Ohya K, Abo W, Tamaki H, Sugawara C, Endo T, Nomachi S, et al.  
601 Presymptomatic diagnosis of Wilson disease associated with a novel mutation of the  
602 ATP7B gene. *Eur J Pediatr*. 2002;161(2):124-6.
- 603 37. Owada M, Suzuki K, Fukushi M, Yamauchi K, Kitagawa T. Mass screening for  
604 Wilson's disease by measuring urinary holoceruloplasmin. *J Pediatr*. 2002;140(5):614-6.
- 605 38. Bost M, Piguet-Lacroix G, Parant F, Wilson CM. Molecular analysis of Wilson  
606 patients: direct sequencing and MLPA analysis in the ATP7B gene and Atox1 and  
607 COMMD1 gene analysis. *J Trace Elem Med Biol*. 2012;26(2-3):97-101.
- 608 39. Carter H, Douville C, Stenson PD, Cooper DN, Karchin R. Identifying Mendelian  
609 disease genes with the variant effect scoring tool. *BMC Genomics*. 2013;14 Suppl 3:S3.
- 610 40. Squitti R, Siotto M, Bucossi S, Polimanti R. In silico investigation of the ATP7B  
611 gene: insights from functional prediction of non-synonymous substitution to protein  
612 structure. *Biometals*. 2014;27(1):53-64.
- 613 41. Yu CH, Lee W, Nokhrin S, Dmitriev OY. The Structure of Metal Binding Domain 1 of  
614 the Copper Transporter ATP7B Reveals Mechanism of a Singular Wilson Disease  
615 Mutation. *Sci Rep*. 2018;8(1):581.
- 616 42. Gao J, Brackley S, Mann JP. The global prevalence of Wilson disease from next-  
617 generation sequencing data. *Genet Med*. 2018.
- 618 43. Whiffin N, Minikel E, Walsh R, O'Donnell-Luria AH, Karczewski K, Ing AY, et al.  
619 Using high-resolution variant frequencies to empower clinical genome interpretation.  
620 *Genet Med*. 2017;19(10):1151-8.
- 621 44. Wildeman M, van Ophuizen E, den Dunnen JT, Taschner PE. Improving sequence  
622 variant descriptions in mutation databases and literature using the Mutalyzer sequence  
623 variation nomenclature checker. *Hum Mutat*. 2008;29(1):6-13.

624 45. Afgan E, Baker D, van den Beek M, Blankenberg D, Bouvier D, Cech M, et al. The  
625 Galaxy platform for accessible, reproducible and collaborative biomedical analyses: 2016  
626 update. *Nucleic Acids Res.* 2016;44(W1):W3-W10.

627 46. Gourdon P, Sitsel O, Lykkegaard Karlsen J, Birk Moller L, Nissen P. Structural  
628 models of the human copper P-type ATPases ATP7A and ATP7B. *Biol Chem.*  
629 2012;393(4):205-16.

630

## 631 **Figure Legends**

632 **Figure 1. Identification of probable and possible low penetrant *ATP7B* variants.**

633 (A) The number of WDMD references was plotted against gnomAD allele frequency for  
634 WD-*ATP7B* variants identified in the gnomAD dataset. (B) VEST3 score was plotted  
635 against gnomAD allele frequency for WD-*ATP7B* variants identified in the gnomAD  
636 dataset. Variants reported in the Gomes et al [15] review as being the most common WD-  
637 *ATP7B* variants in various geographic regions are denoted by red dots and those not  
638 reported in the Gomes et al review by blue dots. In (A) 13 variants were classified as  
639 *probable* low penetrant based on relatively high allele frequencies, low numbers of WDMD  
640 references and not being reported in the Gomes et al. review (boxed). In (B) 11 variants  
641 were classified as *possible* low penetrant based on a VEST3 score of <0.5 (boxed).

642

643 **Figure 2. The mutational landscape of *ATP7B*.** (A) The number of WD missense, non-  
644 WD missense and LoF *ATP7B* variants located in the amino (N)-terminal one-third of the  
645 coding sequence (white bars; encompassing amino acids 1 to 480) was compared to the  
646 number of variants in the carboxy (C)-terminal two-thirds of the coding sequence (gray  
647 bars; encompassing amino acids 481 to 1465). The difference compared to the expected

648 number of variants, based on an even distribution across the coding sequence, was  
649 assessed using Fisher's Exact test (\*\*\*\*,  $p < 0.0001$ ; ns, not significant). (B) The number of  
650 WD-missense, non-WD missense and LoF *ATP7B* variants located in the functional  
651 domains and linker regions of the *ATP7B* coding sequence (cyan boxes, metal binding  
652 domains; orange boxes, transmembrane domains; yellow box, actuator (A) domain; blue  
653 boxes, phosphorylation (P) domain; red boxes, nucleotide (N) domain; gray boxes, linker  
654 regions, N- and C-termini) were compared against the number of variants expected, based  
655 on an even distribution across the coding sequence, and expressed as percentage of  
656 variants observed minus percentage of variants expected. WD missense variants (red  
657 line), non-WD missense variants (gray line), LoF variants (blue line). (C) Coding sequence  
658 position was plotted against VEST3 score for WD missense variants (red dots) and non-  
659 WD missense variants (black dots). Positions of LoF variants are shown above the plot as  
660 blue triangles. Box and whisker plots show the median, quartiles and range of VEST3  
661 scores for non-WD and WD missense variants. The *ATP7B* domains in panels B and C  
662 are as described in Gourdon et al. [46]. The exon structure of the *ATP7B* coding sequence  
663 is shown below the plots.

664

## 665 **Supporting Information**

666 **Table S1. Disease causing variants identified in the Wilson Disease Mutation**

667 **Database**

668 **Table S2. Disease causing variants identified by a literature search between 2010**

669 **and 2017.**

670 **Table S3. *ATP7B* loss of function variants and CNV deletions identified in gnomAD**

671 **and ExAC databases.**

672 **Figure S1. Comparison of non-WD missense and WD missense *ATP7B* variants**  
673 **using 16 VEP algorithm scores.**

674 **Figure S2. Receiver operating characteristic (ROC) curve analysis was used to**  
675 **assess the effectiveness of 16 VEP algorithms to discriminate between WD**  
676 **missense and non-WD missense *ATP7B* variants.**

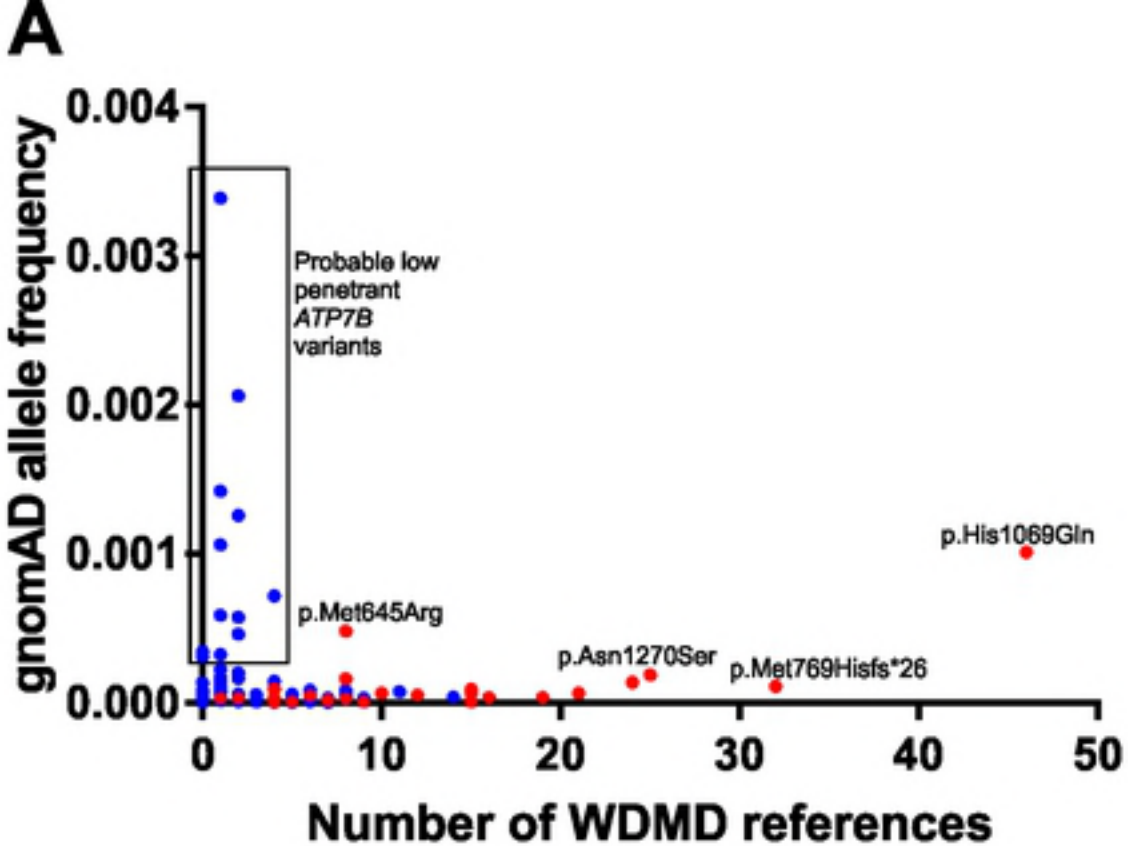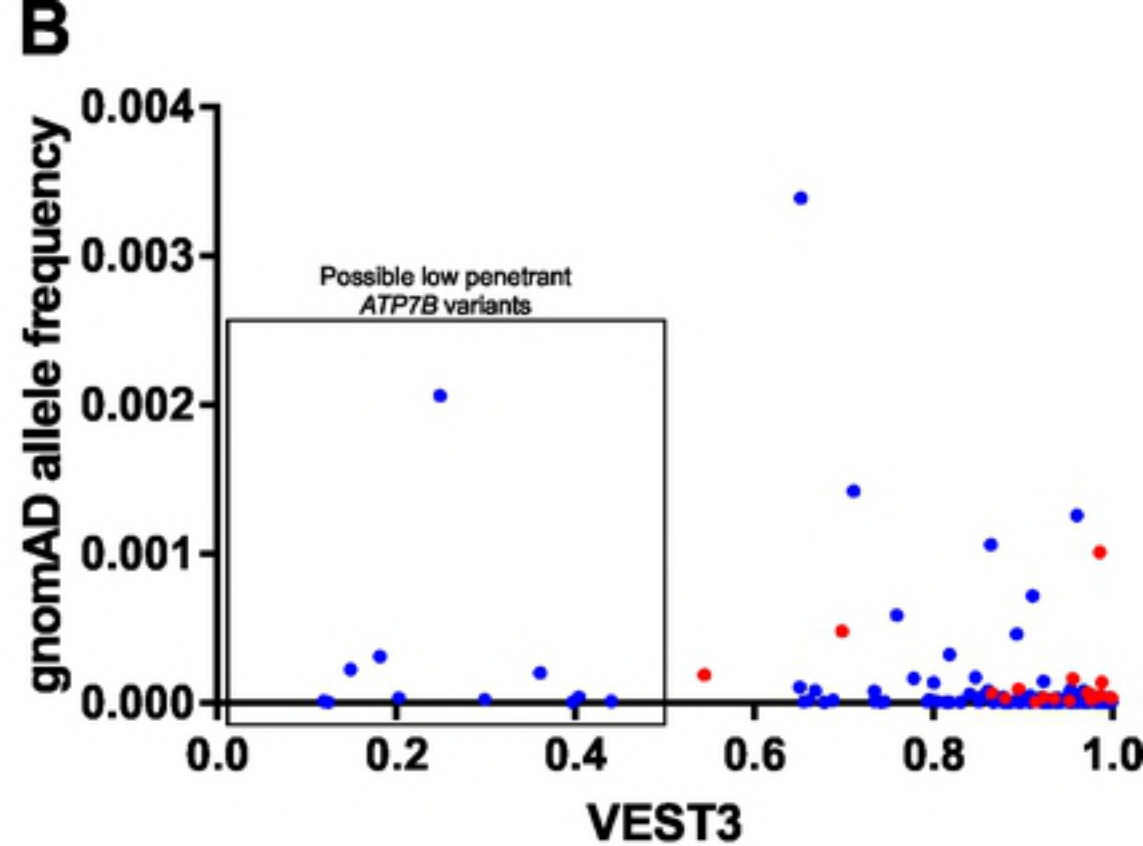

Figure 1

Figure 1



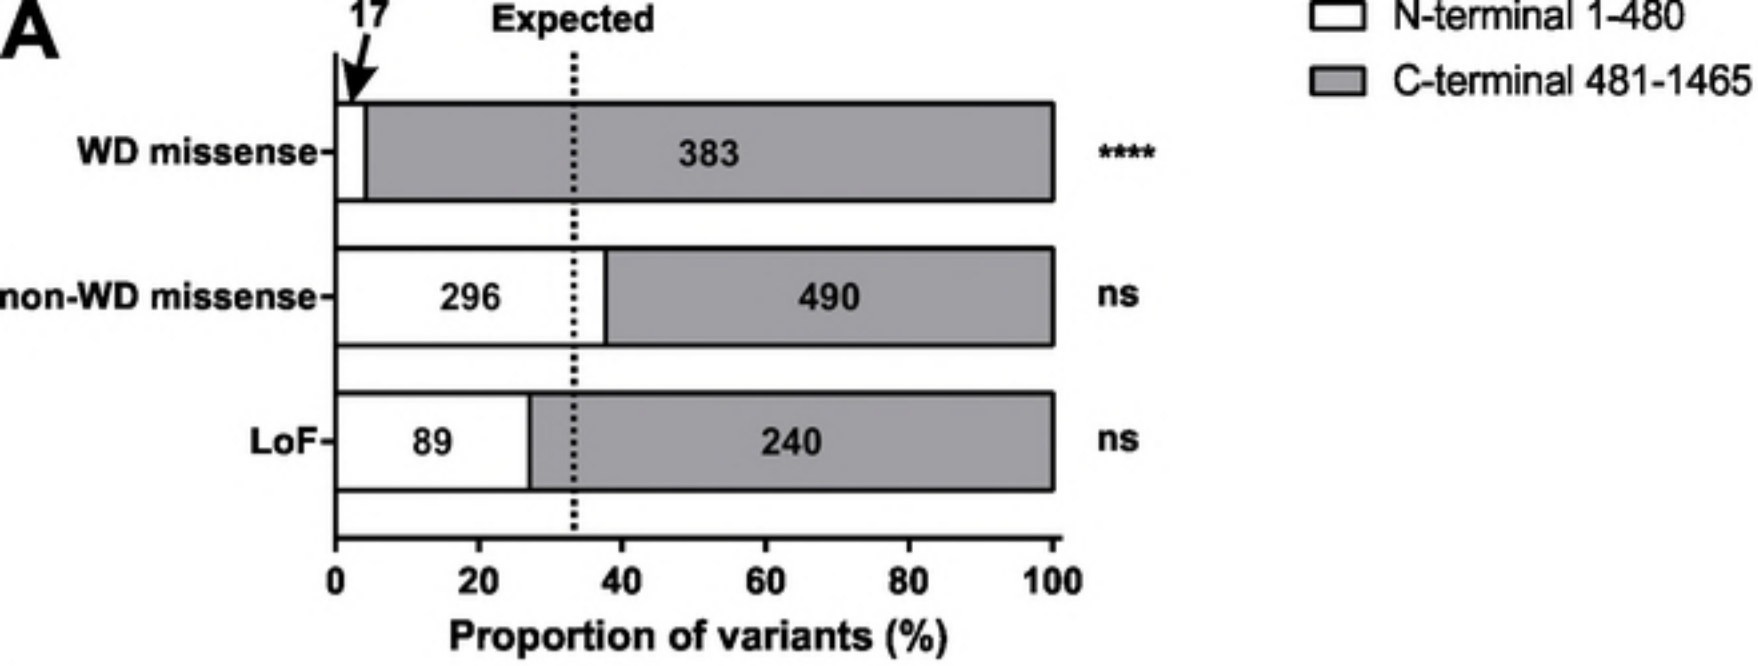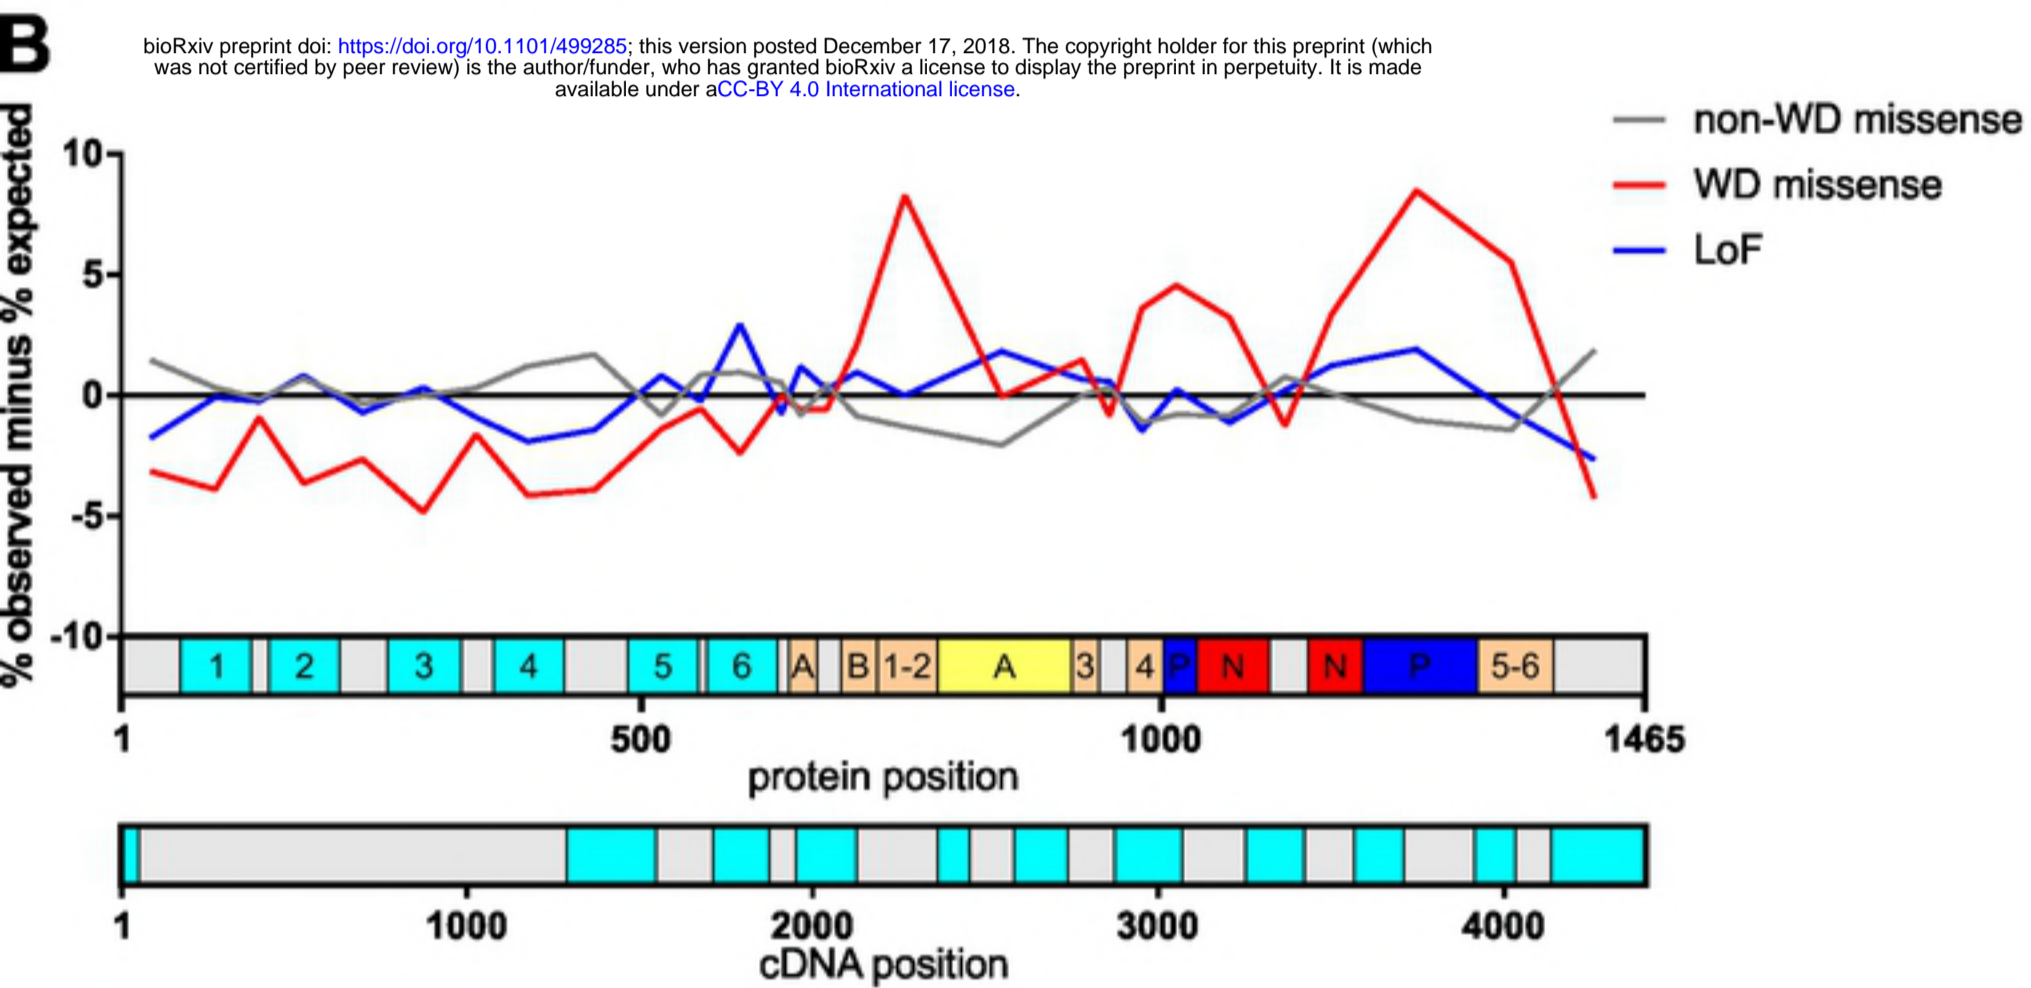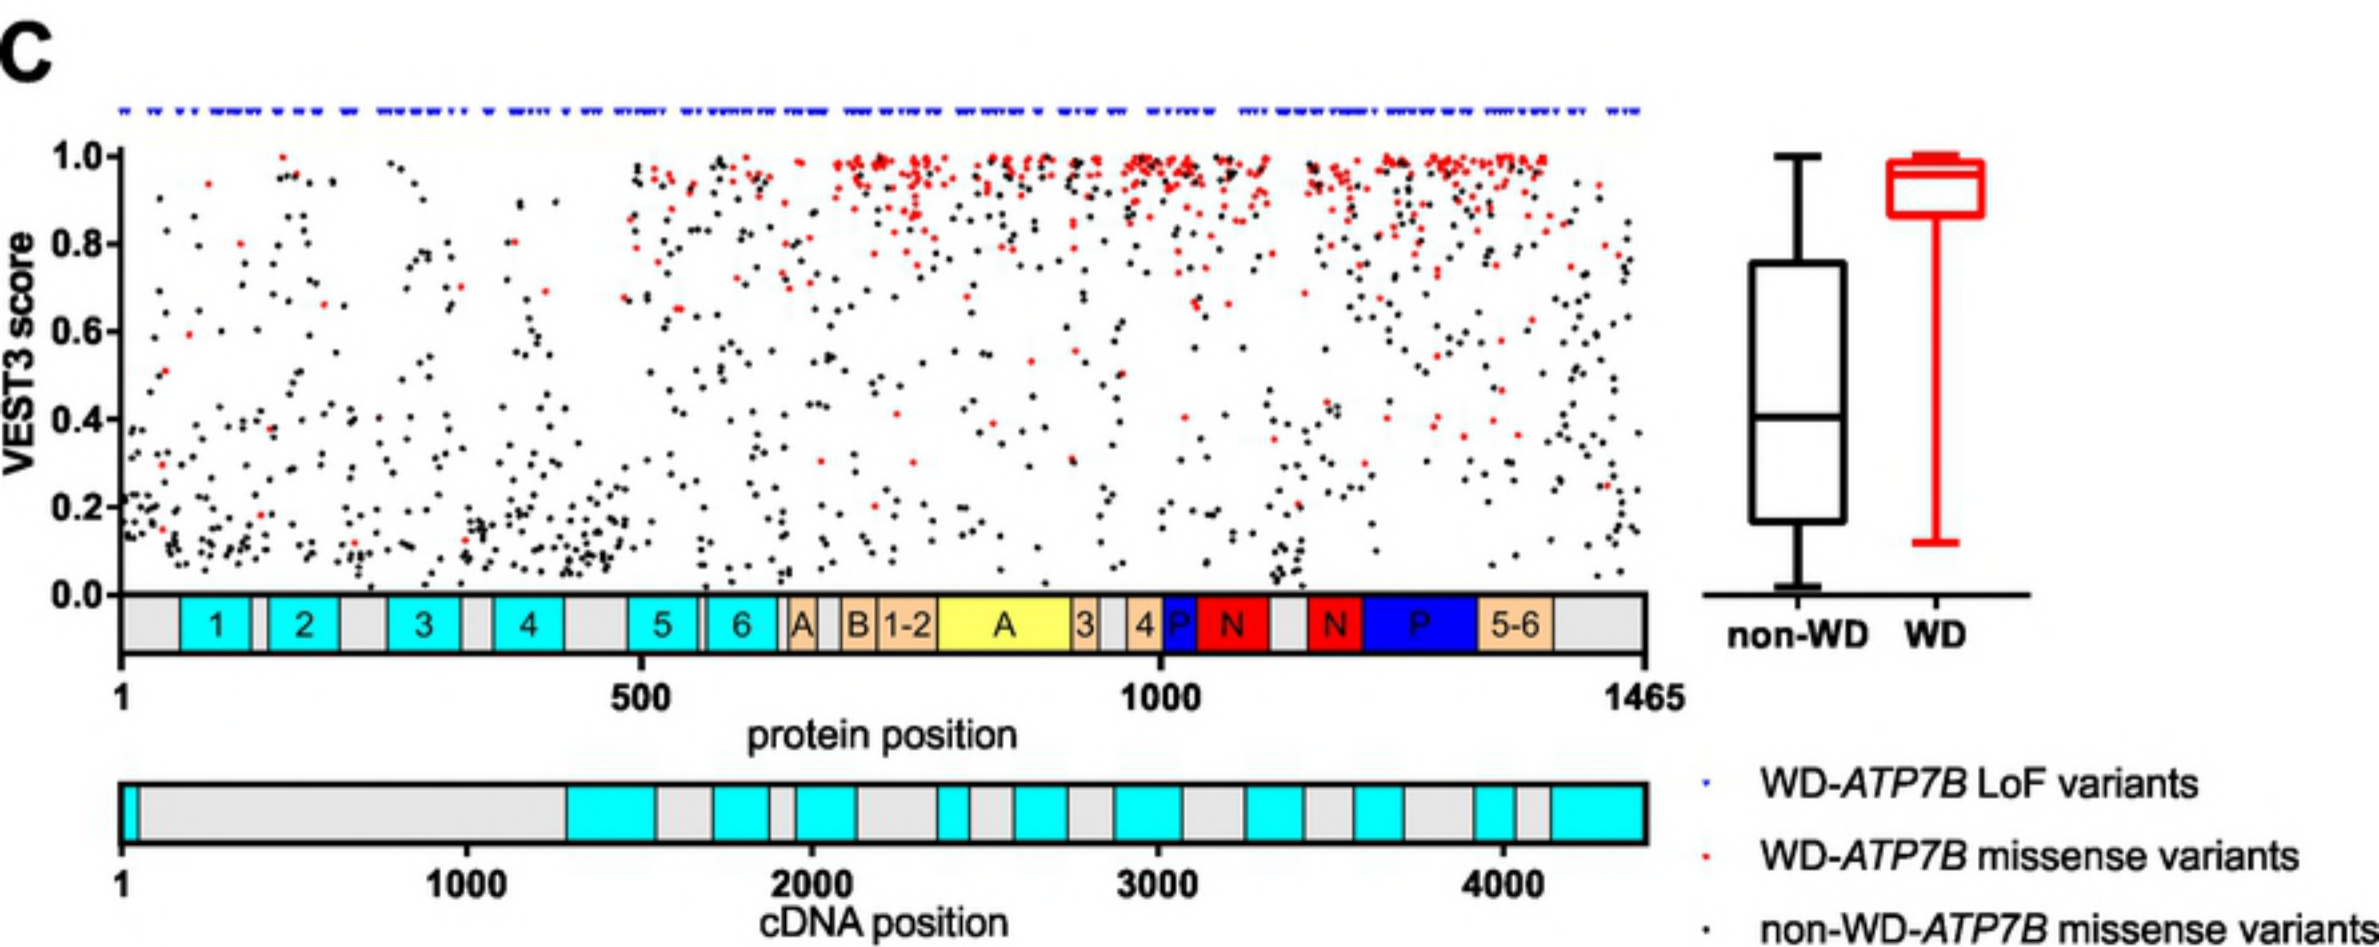

Figure 2

Figure 2
